# Supplementary material for: Randomized controlled trial of acupuncture for anxiety and depression in patients with chronic insomnia
Source: PubMed Central journal article supplement — Ann Transl Med. 2021 Sep;9(18):1426. doi: 10.21037/atm-21-3845 (PMC8506741; doi:10.21037/atm-21-3845), 2021-09
Supplement: atm-09-18-1426-dss.pdf [file atm-09-18-1426-dss.pdf]

## Data Sharing Statement

|                     |                                                                                                                                                     |                                                                                                                                                                                                                                        |
|---------------------|-----------------------------------------------------------------------------------------------------------------------------------------------------|----------------------------------------------------------------------------------------------------------------------------------------------------------------------------------------------------------------------------------------|
| <b>Article Info</b> | <a href="https://dx.doi.org/10.21037/atm-21-3845">https://dx.doi.org/10.21037/atm-21-3845</a>                                                       |                                                                                                                                                                                                                                        |
| <b>Item</b>         | <b>Question</b>                                                                                                                                     | <b>Authors' Response<br/>(place "-" if not applicable)</b>                                                                                                                                                                             |
| 1                   | Would you like to share data collected for your study to others?                                                                                    | No.                                                                                                                                                                                                                                    |
| 2                   | If not, would you like to share the reason for your decision?                                                                                       | We do not plan to share the original data of this study for the time being, because we will add PSG data for objective efficacy evaluation and mechanism study later, and all data of this study will be shared together at that time. |
| 3                   | What data in particular will be shared?                                                                                                             | -                                                                                                                                                                                                                                      |
| 4                   | Any other documents will be shared? Such as study protocol, statistical analysis plan, informed consent form, clinical study report, analytic code. | -                                                                                                                                                                                                                                      |
| 5                   | When will data availability begin?                                                                                                                  | -                                                                                                                                                                                                                                      |
| 6                   | When will data availability end?                                                                                                                    | -                                                                                                                                                                                                                                      |
| 7                   | To whom will you share the data?                                                                                                                    | -                                                                                                                                                                                                                                      |
| 8                   | For what type of analysis or purpose?                                                                                                               | -                                                                                                                                                                                                                                      |
| 9                   | How or where can the data/documents be obtained?                                                                                                    | -                                                                                                                                                                                                                                      |
| 10                  | Any other restrictions?                                                                                                                             | -                                                                                                                                                                                                                                      |
