# Supplementary material for: Randomized controlled trial of acupuncture for anxiety and depression in patients with chronic insomnia
Source: PubMed Central journal article supplement — Ann Transl Med. 2021 Sep;9(18):1426. doi: 10.21037/atm-21-3845 (PMC8506741; doi:10.21037/atm-21-3845), 2021-09
Supplement: atm-09-18-1426-tp.pdf [file atm-09-18-1426-tp.pdf]

# 临床研究实施方案

课题编号：JD201810

课题来源：江苏省中医药管理局

课题名称：基于 HPA 轴联合 PSG 探讨针刺治疗慢性失眠症睡眠节律的机制研究

负责人：吴文忠、刘成勇

承担科室：针灸康复科

联系手机：13851415038

研究年限：2019 年 01 月—2020 年 12 月

版本日期：2018 年 11 月 12 日

版本号：2.0

## 摘要

**题目** 基于 HPA 轴联合 PSG 探讨针刺治疗慢性失眠症睡眠节律的机制研究

**目的** 运用 PSG 结合量表客观评价针刺治疗慢性失眠症的疗效；基于下丘脑-垂体-肾上腺 (HPA) 轴探讨针刺改善慢性失眠症睡眠节律的作用机制。

**试验设计** 本研究通过观察针刺治疗慢性失眠症患者前后 PSQI、ISI、FS-14 量表、HAMA、HAMD 精神症状评定量表及 PSG 监测指标的变化综合评价其疗效；运用代谢组学检测 HPA 轴相关激素促肾上腺皮质激素 (ACTH)、促肾上腺皮质激素释放激素 (CRH)、皮质醇 (CORT) 及 5-羟色胺 (5-HT) 在血浆中的含量变化，探讨针刺改善慢性失眠症患者睡眠节律紊乱的作用机制。

**受试人群** 自愿受试的慢性失眠症患者 (试验组) 和假针刺治疗的慢性失眠症患者 (对照组)。

**样本量** 60 例，试验组与对照组各 30 例。

**治疗方案** 试验组：隔日 1 次，每周 3 次，治疗 4 周，共 12 次。

对照组：疗程同实验组，给予假针刺治疗。

**诊断、辨证指标** 美国睡眠医学会《睡眠障碍国际分类》第三版

**主要疗效指标** PSQI、ISI、FS-14、HAMA、HAMD、PSG

**次要疗效指标** ACTH、CRH、CORT、5-HT

**统计** PSQI、ISI、FS-14、HAMA、HAMD 评分、PSG 疗效指标及 ACTH、CRH、CORT、5-HT 进行数据统计分析

## 目录

|       |                |      |                  |
|-------|----------------|------|------------------|
| 1     | 研究背景及研究基础      | 9.4  | 提高受试者依从性措施       |
| 2     | 试验目的           | 9.5  | 质量控制和质量保证系统      |
| 3     | 试验设计类型、原则与试验步骤 | 10   | 数据管理             |
| 3.1   | 试验设计类型         | 10.1 | 数据记录             |
| 3.2   | 试验设计原则         | 10.2 | 数据报告             |
| 3.2.1 | 病例数            | 10.3 | 数据监查             |
| 3.2.2 | 随机             | 10.4 | 数据核查             |
| 3.2.3 | 对照             | 11   | 统计分析             |
| 3.4   | 试验步骤           | 11.1 | 分析计划书与统计软件       |
| 4     | 病例选择           | 11.2 | 分析数据集的选择         |
| 4.1   | 诊断标准           | 11.3 | 统计分析内容           |
| 4.2   | 纳入标准           | 11.4 | 统计分析方法           |
| 4.3   | 排除标准           | 12   | 伦理原则             |
| 4.4   | 试验病例的终止        | 12.1 | 伦理审查             |
| 4.5   | 病例的脱落与处理       | 12.2 | 受益与风险            |
| 4.6   | 病例的剔除          | 12.3 | 招募受试者            |
| 5     | 治疗方案           | 12.4 | 受试者的医疗和保护        |
| 5.1   | 试验用药名称和规格      | 12.5 | 受试者隐私的保护         |
| 5.2   | 服药方法           | 12.6 | 知情同意的过程          |
| 5.3   | 合并用药           | 13   | 总结与资料保存          |
| 6     | 观察项目           | 14   | 任务分配, 预期进度, 预期成果 |
| 6.1   | 一般记录项目         | 15   | 参考文献             |
| 6.2   | 观察指标           |      |                  |
| 6.3   | 观测时点           |      | 附件               |
| 7     | 不良事件的观察        | 1    | 研究者手册            |
| 7.1   | 定义             | 2    | 知情同意书            |
| 7.2   | 试验用药预期不良反应     | 3    | 患者服药记录卡          |
| 7.3   | 不良事件与药物因果关系判断  | 4    | 研究病历             |
| 7.4   | 不良事件的处理        | 5    | 严重不良事件报告表        |
| 8     | 疗效与安全性评定标准     | 6    | 试验用药使用记录表        |
| 8.1   | 综合疗效评定标准       | 7    | 临床试验通讯录          |
| 8.2   | 不良事件轻重程度判断标准   | 8    | 主要研究者履历表与研究者声明   |
| 9     | 试验的质量控制与保证     | 9    | 实验室检查项目正常值范围表    |
| 9.1   | 实验室质控措施        | 10   | 统计计划书            |
| 9.2   | 主要观测指标标准操作规程   | 11   | 伦理委员会批件          |
| 9.3   | 临床试验前培训        |      |                  |

# 基于HPA轴联合PSG探讨针刺调节慢性失眠症睡眠节律的机制研究

## 一、研究背景及研究基础

根据江苏省中医院科技处合同书的要求，进行基于HPA轴联合PSG探讨针刺调节慢性失眠症睡眠节律的机制研究

### 1. 立项依据

失眠症（insomnia）是临床上最常见的睡眠障碍性疾病，以频繁而持续的入睡困难和（或）睡眠维持困难并导致睡眠感不满意为特征的睡眠障碍。根据2014年发布的睡眠障碍国际分类第三版（International Classification of Sleep Disorders-3, ICSD-3），失眠症分为慢性失眠症、短期失眠症及其他类型的失眠症。在成人中符合失眠症诊断标准者达10%-15%，且呈慢性化病程，慢性失眠症严重损害患者的身心健康，影响患者的生活质量，甚至诱发交通事故等意外而危及个人及公共安全<sup>[1]</sup>。失眠是导致焦虑抑郁的重要危险因素，同时焦虑抑郁又会加重患者的失眠症状，两者关系密切，互相促进和影响，甚至增加自杀风险，严重影响患者的预后与生存质量。

西医认为，慢性失眠症与睡眠-觉醒节律紊乱密切相关，探究失眠相关节律基因及物质表达并从根源上研究认识失眠，有助于寻找治疗失眠的新途径，是临床上治愈失眠的正确方向。近些年来，关于失眠的机制研究主要分为以下几个主流趋势：下丘脑-垂体-肾上腺（HPA）轴功能失调、褪黑素系统功能下降、中枢神经递质的紊乱、迷走神经张力变化、炎症反应因子的影响、边缘皮质系统环路的结构或功能异常<sup>[2]</sup>。其中，HPA轴、褪黑素系统尤为受关注，因为失眠并不只是单纯的睡眠缺失，它是中枢神经系统觉醒状态的紊乱，是睡眠-觉醒节律的紊乱。因此，基于失眠的治疗，不应只关注患者睡眠时长的增加，更应该着重于睡眠节律的调整，减少生理以及情感上的冲动，改善日间功能。西医

临床上将认知行为疗法作为失眠障碍患者一线疗法，从患者的情感认知上进行宣教，但由于疗程长、患者依从性等问题而疗效降低，而苯二氮卓类受体激动剂安眠类药物由于其依赖性和副作用不易被患者接受<sup>[3]</sup>。大多数慢性失眠症患者希望采用简单有效的非药物疗法来摆脱对安眠类药物的依赖。而针灸治疗失眠症显示出其临床独特优势，基于有序数据 Meta 分析模型显示针灸治疗原发性失眠症疗效优于苯二氮卓类药物<sup>[4]</sup>。

中医认为，天人合一，天有昼夜，人有寤寐。失眠，中医称为“不寐”、“不得卧”、“不得眠”。《灵枢·口问》云：“卫气昼日行于阳，夜半则行于阴，阴者主夜，夜者主卧……阳气尽，阴气盛则目瞑；阴气尽而阳气盛则寤矣”。《景岳全书》中有言：“无邪而不寐者，必营气不足也，营主血，血虚则无以养心，心虚则神不守舍。”可见人之寤寐，由阴阳调控，心神所主，若阴阳失调，心神失养，则神不安舍，入寐困难而致失眠，故治则当以调和阴阳，宁心安神为主。《灵枢·官能篇》谓：“用针之要，在于调阴阳，经气乃光，合形与气，使神内藏”，指出针灸治疗失眠精要在于调和阴阳，宁心安神。《素问·阴阳应象大论篇》提出：“善用针者，从阴引阳，从阳引阴……以观过与不及之理，见微得过，用之不殆。”“从阴引阳，从阳引阴”作为针刺法则，是阴阳学说在针灸临床的具体应用，是调节阴阳节律平衡的根本原则。阴阳节律失衡是失眠的根本病机，用针者遵循“从阴引阳，从阳引阴”的原则，而达到调节人体阴阳节律，使机体经络、脏腑、表里、上下、左右、气血恢复为平衡状态，使阳入于阴、阴阳交和而失眠得愈。国家级名老中医吴旭教授在数十年临床实践经验基础上，提出“通督温阳法”治疗失眠，能有效改善患者的睡眠质量<sup>[5]</sup>。江苏省中医院针灸康复科吴文忠教授秉承“通督温阳法”之精髓，结合现代慢性失眠症的发病特点，形成了“调和阴阳”针刺法（百会、印堂、神门、三阴交）来治疗慢性失眠症患者，能有效改善患者匹兹堡睡眠质量指数(Pittsburgh Sleep Quality Index, PSQI)、多导睡眠图(PSG)等观察指标。

虽然针刺法治疗慢性失眠症疗效确切，但缺乏规范化临床研究，同时其作用机制尚不明确，限制了该治疗方法进一步推广，主要归纳如下：

(1) 现有的针灸治疗慢性失眠症的临床研究多以主观量表评分为评价指标，缺乏实时性、客观性

近些年来，由于失眠问题备受关注，许多国家的学者们对睡眠问题进行研究，研发了 20 多个不同侧重方面的睡眠量表，包括较全面反映睡眠质量的匹兹堡睡眠质量指数量表(PSQI)、阿森斯失眠量表(AIS)等,以及分别侧重于对失眠严重程度、睡眠认知、睡眠损害程度、睡眠行为进行评价及日间功能进行评价的量表,如失眠严重指数量表(ISI)、睡眠不良信念与态度量表(DBAS)、睡眠损害量表(SII)、睡眠行为量表(SBS)、疲劳严重程度量表(FS-14)等。这些量表在临床中被广泛用于慢性失眠症的诊断和疗效评价。但有学者通过研究临床试验的结局指标发现，国内对针刺治疗失眠的疗效评价主要停留在量表的评分和疗效的等级分类上（即临床治愈、显效、有效、无效），而国际上在报告某种干预措施治疗失眠的定量研究疗效评价和结局测量指标的时候，多采用定量指标，而较少使用定性指标，几乎没有等级分类的指标<sup>[6]</sup>。

(2)既往针灸治疗慢性失眠症的临床研究多以疗效验证、方案优化为主，较少涉及作用机制研究

本课题组通过搜索 2018 年 7 月底之前有关针灸治疗慢性失眠症的中文文献和英文文献（中文文献来自中国知网，英文文献来自 pubmed 数据库），发现针灸治疗慢性失眠症临床研究文献主要有以下几个方面：①针灸治疗失眠前后临床疗效观察；②不同针灸方法或者综合疗法治疗失眠临床疗效对比；③针灸治疗某一类型失眠的临床疗效观察；④针灸治疗失眠的临床疗效评价指标存在不同。总结来说，或限于疗效对比，或拘于针刺手法，或固于失眠类型，或囿于观察指标，只有极少数研究通过神经内分泌、功能影像学对针刺治疗慢性失眠症进行机制探讨<sup>[7]</sup>。已有研究表明睡眠-觉醒状态节律变化在神经系统方面与褪黑素直接相关，在内分泌方面与人体环境中皮质醇等联系密切<sup>[8]</sup>（如图 1）。临床观察发现针刺治疗后，慢性失眠症患者夜间睡眠质量及日间功能障碍均明显改善，而针刺是否能够通过调节 HPA 轴或皮质醇分泌状态从而改善慢性失眠症患者睡眠-觉醒节律的相关论述甚少。

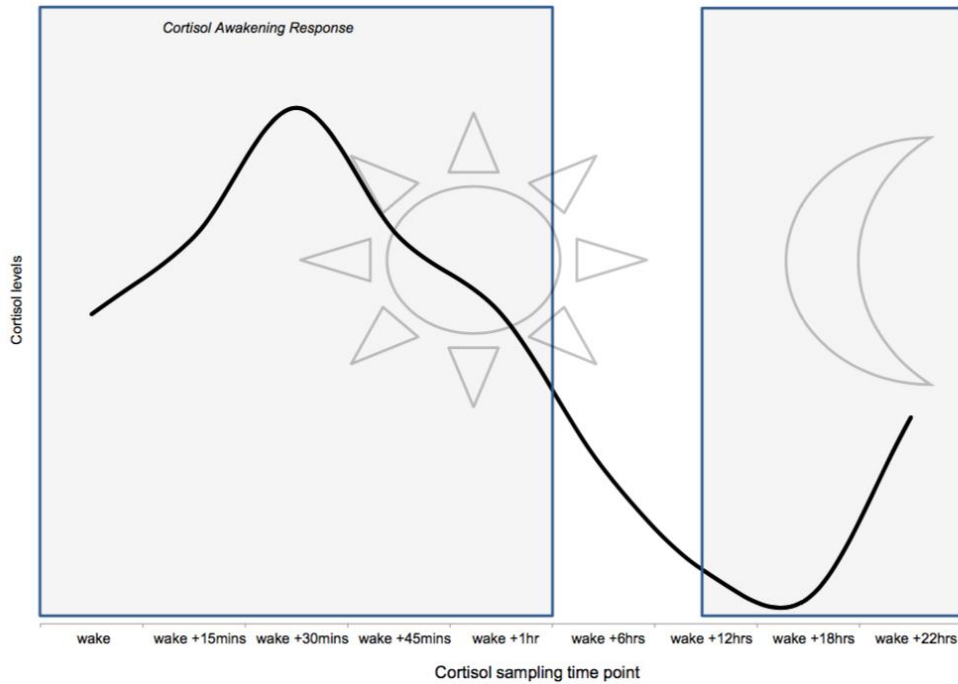

图 1：皮质醇 24h 分泌水平变化

针对以上关键问题，结合我们前期研究基础提出以下解决方案：

### (1) 运用多导睡眠图作为慢性失眠症的诊断及客观疗效评价依据

多导睡眠图（Polysomnography, PSG）监测是睡眠医学的基础评价技术，是现有的睡眠医学评价技术中最基本、最重要、应用最广泛的定量指标，是诊断睡眠呼吸疾患的金标准<sup>[9]</sup>。PSG 监测能避免 PSQI、ISI、FS-14 等量表评估时存在的人为主观性，实时、客观评估慢性失眠症患者的确切情况并对其进行评估，还有助于准确客观评价患者失眠程度。通过 PSG 可以将睡眠分期：清醒期（W 期）、快速动眼睡眠期（R 期）、N1 期睡眠、N2 期睡眠、N3 期、N4 期睡眠，进而可以得出睡眠质量评价指标如睡眠总时间、入睡潜伏期、实际睡眠时间、觉醒次数、觉醒时间等，可为针刺治疗慢性失眠症提供实时、客观的评价指标。本课题组前期就慢性失眠症患者量表评分与 PSG 监测结果进行比对分析，结果显示：大多数伴有焦虑、抑郁情绪的慢性失眠症患者量表评分与 PSG 监测结果不符，此时，PSG 监测结果更客观，更具有参考价值。

### (2) 基于下丘脑-垂体-肾上腺(HPA)轴探讨针刺调节慢性失眠症睡眠节律的神经内分泌机制

现代研究显示,失眠患者通常伴有下丘脑-垂体-肾上腺轴(HPA)的功能失调,具体表现为促肾上腺皮质激素释放激素(CRH)和皮质醇(CORT)的分泌明显增加<sup>[8]</sup>。HPA轴是人体重要的神经内分泌通路之一。下丘脑室旁核分泌的CRH可以刺激促肾上腺皮质激素(ATCH)释放,ACTH又能刺激CORT的分泌,而下丘脑、垂体、肾上腺之间又存在着负反馈,因此CORT的浓度又能反过来影响CRH、ACTH的分泌。已经有研究证明CORT是通过调节CRH的分泌,从而影响睡眠。那些压力过重或者生活节奏紧张的人或者长期失眠的人,处于慢性应激状态下,会激活杏仁核,从而激活HPA轴,增加CORT的分泌。同时,应激状态还可以引起精氨酸加压素系统(AVP)的过度活化,会进一步引起HPA轴的活化,AVP还能加强ACTH和CORT的分泌,这些过程中升高的CORT会激活杏仁核等下丘脑外的糖皮质激素受体(GR),GR又会正反馈于垂体,导致CRH的分泌增多。这种恶性循环导致CORT长期处于高值状态,继而引发慢性失眠<sup>[2]</sup> (图2)。慢性失眠症睡眠节律紊乱主要是HPA轴功能亢进引起,表现为CRH、ATCH、CORT分泌增加。课题组研究“通督温阳”针刺法所选用的头部督脉穴位解剖结构后,发现穴下有与睡眠-觉醒密切相关的脑干网状结构,推断针刺头部穴位,可通过脑干上行激活系统使大脑皮层兴奋性增强,恢复兴奋与抑制过程的平衡,改善失眠状态,调整睡眠-觉醒节律,这与HPA轴机理相似。故通过检测慢性失眠症患者针刺治疗前后血浆中CRH、ACTH、CORT、5-HT含量变化以探究其作用机制。



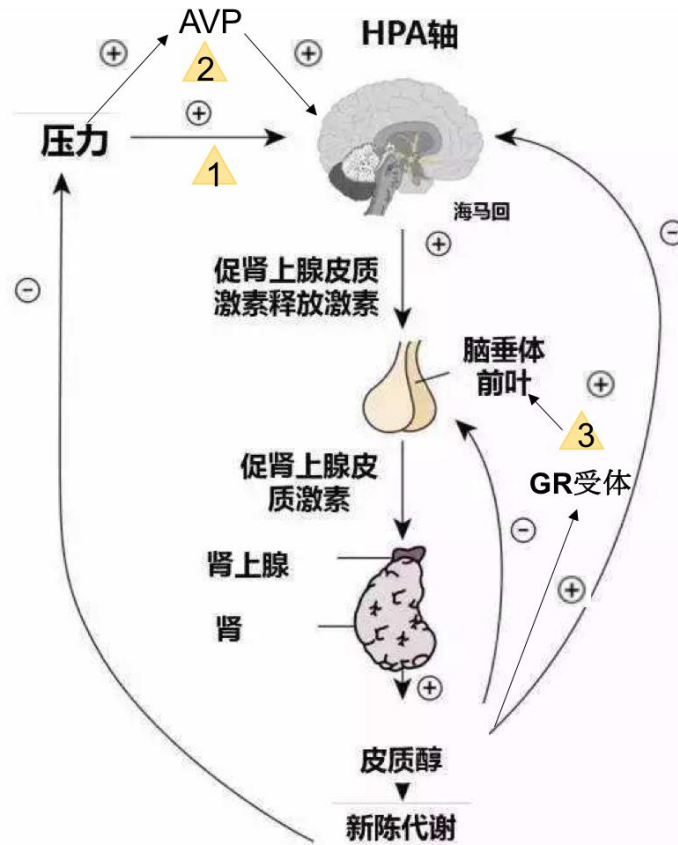

图 2：慢性失眠症的 HPA 轴机制

因此，在前期失眠的多导睡眠图临床研究基础上，本研究运用“通督温阳”针刺法治疗慢性失眠症患者，通过观察针刺治疗前后患者 PSQI、ISI、FS-14、HAMA、HAMD 量表评分以及 PSG 监测指标的变化来综合评价其临床疗效；并检测慢性失眠症患者 HPA 轴相关激素促肾上腺皮质激素(ACTH)、促肾上腺皮质激素释放激素(CRH)、皮质醇(CORT)、5-羟色胺(5-HT)在血浆中的含量变化，探讨针刺对下丘脑-垂体-肾上腺(HPA)轴的调节作用以及针刺改善慢性失眠症患者睡眠节律紊乱的作用机制。

#### 参考文献：

- [1]中国睡眠研究会.中国失眠症诊断与治疗指南[J].中华医学杂志, 2017,97(24):1844-1856.
- [2]程国良, 钱彦方, 李静,等.失眠机制研究进展[J]. 世界睡眠医学杂志, 2016,3(3):174-179.
- [3]Morin CM, Beaulieu-Bonneau S, Ivers H, et al. Speed and trajectory of changes of insomnia symptoms during acute treatment with cognitive-behavioral therapy, singly and combined with medication [J] .Sleep Med,2014,15(6):701-707.
- [4]刘强, 王秀娟, 赵颖,等.基于有序数据 Meta 分析模型评价针灸疗效研究:原发性失眠症[J]. 辽宁中医杂志,2017,44(1):134-137.

- [5]卢勤妹.吴旭教授通督温阳法临床应用[J].辽宁中医药大学学报, 2011,13(11):16-17.
- [6]路桃影.匹兹堡睡眠量表的测量特性及其最小重要差值的研究 [D].广州: 广州中医药大学, 2012, 硕士学位.
- [7]刘义, 冯慧, 莫亚莉, 等.针刺对原发性失眠症患者过度觉醒干预作用及其相关神经电生理学机制研究[J]. 中华中医药学刊, 2017,35(3):665-668.
- [8]Elder G J, Wetherell M A, Barclay N L, et al. The cortisol awakening response – Applications and implications for sleep medicine[J].Sleep Medicine Reviews, 2014,18(3):215-224.
- [9]段莹,高和.标准多导睡眠监测的技术规范和应用范围[J].世界睡眠医学杂志, 2014, 1(1): 38-41.

## 2.研究基础

2.1 本课题组长期开展针灸治疗慢性失眠症的临床研究,包括头针治疗失眠的疗效评价、针刺配合耳穴治疗心脾两虚型失眠的临床研究等一系列研究,发表相关论文 7 篇。

(1)万青云,赵晓萌,吴文忠,刘成勇,赵亚楠,贺挺.从“月-人相关”谈抑郁症[J].中医学报,2019,34(06):1134-1137.

(2) 万青云,吴文忠,刘成勇,江磊磊,赵亚楠,贺挺.基于《伤寒论》的焦虑性失眠中医论治探讨[J].时珍国医国药,2018,29(10):2465-2466.

(3) 万青云, 吴文忠, 刘成勇, 等.头针治疗失眠研究进展[J].四川中医, 2018,36(4):201-204.

(4) 赵晓萌,万青云,吴文忠,陈栋,刘成勇,赵亚楠,贺挺.慢性疲劳综合征之“郁”论浅识[J].天津中医药,2018,35(04):278-280.

(5) 秦珊, 刘成勇, 孙建华, 等.针刺配合耳穴贴压治疗心脾两虚型失眠病的临床疗效观察[J],长江大学学报,2015,12 (36) :1-3.

(6) 赵亚楠, 吴文忠, 刘成勇, 等.基于内外同治之理探讨穴位贴敷疗法的中医理论体系[J].针灸临床杂志, 2019.07-08 (拟发表)

(7) 赵亚楠, 吴文忠, 刘成勇, 等.通督调神法治疗慢性失眠症的理论探微[J].针灸临床杂志, 2019.07 (拟发表)

2.2 吴旭教授学术继承人吴文忠教授在“通督温阳法”基础上,结合现代慢性失眠症的发病特点,通过 10 余年临证经验总结出了“调和阴阳”针刺法(百会、神

庭、印堂、神门、三阴交），并经前期预试验显示具有较好临床疗效。

前期预试验结果显示：与治疗前相比，针刺治疗后慢性失眠症患者 PSQI 量表各因子积分及总分均出现明显下降，其差值具有统计学意义，说明本研究治疗方案能有效改善慢性失眠症患者的睡眠质量，临床有效（如表 1、图 3）。

表 1：针刺治疗前后 PSQI 量表各因子积分比较( $\bar{x} \pm s, n=15$ )

|      | 治疗前        | 治疗后         |
|------|------------|-------------|
| 睡眠质量 | 2.39±0.82  | 1.43±0.63*  |
| 入睡时间 | 2.67±0.71  | 1.92±0.72*  |
| 睡眠时间 | 2.92±0.78  | 1.72±0.71*  |
| 睡眠效率 | 2.54±0.74  | 1.62±0.65*  |
| 睡眠障碍 | 2.37±0.88  | 1.52±0.91*  |
| 睡眠药物 | 1.91±0.89  | 1.42±0.85*  |
| 日间功能 | 2.09±0.87  | 1.47±0.82*  |
| 总分   | 16.74±6.52 | 11.34±5.63* |

注：与治疗前相比，\*P<0.05。

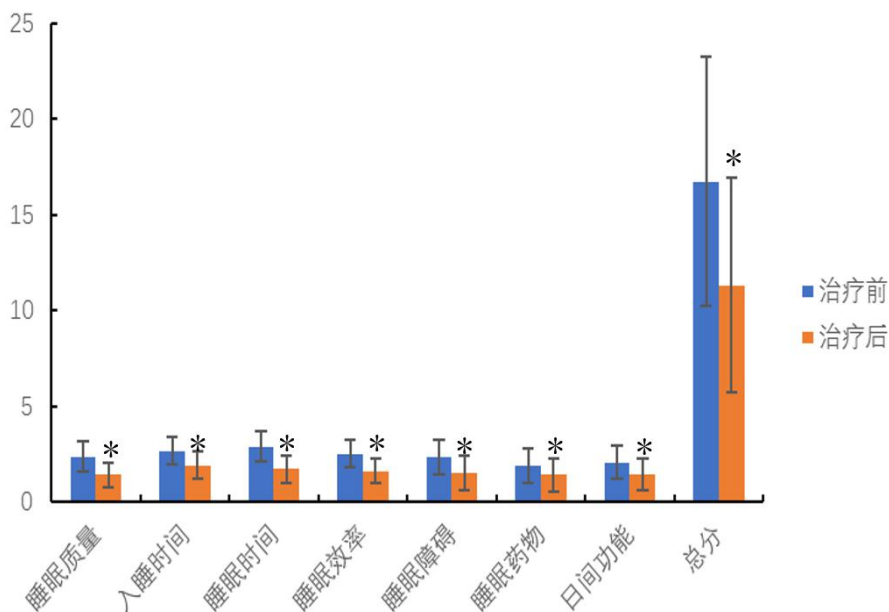

注：与治疗前相比，\*P<0.05。

图 3：针刺治疗前后 PSQI 量表各因子积分比较

## 二、试验目的

主要目的：运用 PSG 结合量表客观评价针刺治疗慢性失眠症的临床疗效。

次要目的：基于下丘脑-垂体-肾上腺(HPA)轴探讨针刺改善慢性失眠症睡眠节律的作用机制。

### 三、试验设计类型、原则

本研究按 1: 1 纳入慢性失眠症患者并随机分为试验组与对照组，每组 30 例。用随机数字表结合信封隐藏分组的方法，将 SPSS22.0 软件生成的随机号写在卡片上，密封进不透光的信封中，由专人保管。确定入组后，受试者按其入组顺序对应选取信封，治疗前将信封交于医生，随即拆开，信封内所对应的随机数字即受试者的分组。以达到随机隐藏和分组隐匿的目的，使得治疗随机分配，分配过程不受干扰。

本临床研究遵循盲法原则，在盲法实施的过程中，对纳入的受试者、结局评价者及数据统计者实行盲法。考虑针刺疗法的特殊性，对针灸医师不设盲。

### 四、病例选择

(一) 诊断标准（参照美国睡眠医学会《睡眠障碍国际分类》第三版制定）

A.患者报告，或患者父母或照顾者观察到患者存在下列 1 条或以上：(1)入睡困难；(2)睡眠维持困难；(3)比期望的起床时间醒来早；(4)在适当的时间点不肯上床睡觉；(5)没有父母或照顾者干预难以入睡。

B.患者报告，或患者父母或照顾者观察到患者存在下列与夜间睡眠困难相关的 1 条或以上：(1)疲劳或萎靡不振；(2)注意力、专注力或记忆力下降；(3)社交、家庭、职业或学业等功能损害；(4)情绪不稳或易激惹；(5)日间瞌睡；(6)行为问题(比如：活动过度、冲动或攻击性)；(7)动力、精力或工作主动性下降；(8)易犯错或易出事故；(9)对自己的睡眠质量非常关切或不满意。

C.这些睡眠/觉醒主诉不能完全由不合适的睡眠机会(如充足的睡眠时间)或环境（如黑暗、安静、安全、舒适的环境）解释。

D.这些睡眠困难和相关的日间症状至少每周出现 3 次。

E.这些睡眠困难和相关的日间症状持续至少 3 个月。

F.这些睡眠困难和相关的日间症状不能被其他的睡眠障碍更好地解释。

慢性失眠症 A-F 必须都满足。

## （二）纳入标准

①符合上述中西医关于慢性失眠症诊断标准的患者；②年龄为 18~65 周岁，性别不限；③PSQI 评分 >5 分，HAMA 评分 ≥7 分，HAMD 评分 ≥8 分；④1 个月以内未使用镇静催眠类药物及进行针灸治疗者；⑤无沟通和认知障碍者；⑥自愿接受随机分组并签署知情同意书者。

## （三）排除标准

①诊断为精神分裂症或其他严重精神疾病者；②诊断为阻塞性睡眠呼吸暂停、不宁腿综合征等其他睡眠障碍者；③酒精或其他药物滥用或依赖者；④怀孕或哺乳期等不适宜接受针刺治疗者；⑤最近 3 个月内参加过其他临床试验者。

## （四）脱落及终止试验标准

①患者入组后拒绝配合试验或诊断错误；②研究期间患者自行退出或未完成整个疗程，依从性差；③不能耐受针刺或实验室及多导睡眠图检查，治疗过程中出现严重不良事件、其它疾病引起严重并发症者。

## 五、治疗方案

### 1.基础治疗：睡眠卫生教育

运用失眠中医诊疗信息采集系统（软件著作权，登记号：2019SR0900086）平台对两组患者进行统一睡眠卫生宣教。

### 2.针刺组（试验组）

取穴：百会、印堂、神门（双）、三阴交（双），定位严格按照《中华人民共和国国家标准：经穴部位》（GB12346-90）。

操作：受试者取仰卧位，常规消毒后进一次性无菌针灸针（0.30×40mm，苏州医疗用品厂有限公司）针刺深度为 5-10mm。百会、神庭、印堂均顺督脉方向，将针与皮肤呈 15°角快速刺入帽状腱膜下疏松结缔组织，神门、三阴交直刺。待诸穴得气后，百会和印堂穴位针柄连接低频脉冲电针治疗仪（XS-998B04 型低频脉冲电针治疗仪，南京小松医疗仪器研究所），予连续波型，2Hz 固定频

率，连续刺激 30min，刺激参数（2~5 之间）维持在患者可忍受的强度。30min 后起针。所有针刺均由同一名针灸临床医师在上午完成。

疗程：隔日 1 次，每周 3 次，治疗 4 周，共 12 次。

### 3.假针刺组（对照组）

取穴：双侧肩髃、臂臑、伏兔，定位严格按照《中华人民共和国国家标准：经穴部位》（GB12346-90）。

(Guo J , Wang L P , Liu C Z , et al. Efficacy of Acupuncture for Primary Insomnia: A Randomized Controlled Clinical Trial[J]. Evidence-based Complementary and Alternative Medicine, 2013, 2013(4):163850.)

操作：对照组的参与者将每周三次接受假针灸治疗 4 周。插入穴位深度 1~2mm 处，不进行提插捻转不得气。将低频脉冲电针治疗仪(同针刺组)放置于参与者身旁，电针接于一侧肩髃与臂臑处，开通仪器，但不打开刺激强度按钮，保证电源和计时器的正常显示，30min 后起针。同时，避免手动刺激和得气使安慰剂效应最小化。

疗程：隔日 1 次，每周 3 次，治疗 4 周，共 12 次。

## 六、观察项目

### （一）一般记录项目

受试者姓名拼音首字母，门诊/住院，试验开始日期。

### （二）观察指标

1.匹兹堡睡眠质量指数(Pittsburgh Sleep Quality Index, PSQI)、睡眠严重指数量表(Insomnia Severity Index,ISI)、疲劳严重程度量表(Fatigue Severity Scale,FSS)评价时间点：所有慢性失眠症患者于针灸治疗前、治疗结束时及治疗结束 4 周进行量表评价。

PSQI 是评价人群睡眠质量的问卷调查，包括睡眠质量、入睡时间、睡眠时间、睡眠效率、睡眠障碍、催眠药物和日间功能障碍 7 个成分。PSQI 总分为 0-21 分，得分高低与睡眠质量呈反比，即 PSQI 分值越高提示睡眠质量越差。

PSQI>7 分作为判断睡眠质量问题的参考界值，本课题以 PSQI>7 分作为慢性失眠症纳入的标准。

ISI 是由 Morin 和 Espie (1993) 所发展的自填式量表，目的是评估个体对失眠的主观感受，量表共七题，采用五点评分，前三题评估失眠的严重程度，主要有：入睡困难、无法维持长时间睡眠、早醒三项症状。四至七题评估个体对自己睡眠的满意程度，失眠对白天的影响程度以及对失眠的关注程度。参与者根据近一周的睡眠情况进行填写，分数越高，表明失眠越严重，对个体造成的困扰越大。分数范围为 0-28 分。总分 0-7 分表示没有失眠困扰，8-14 分表示失眠困扰介于临界范围之内，15-21 分表示有中等程度的失眠困扰，22 分-28 分表示有重度失眠困扰。

FS-14 量表由 Trudie Chalder 等学者于 1992 年制定，适用于 16 岁以上成年人。包含 14 个条目，每个条目均从不同角度反映了疲劳的严重程度。条目 1~8 反映躯体疲劳，条目 9~14 反映脑力疲劳，其中条目 1~9，11、12 为正向计分，选择“是”则计“1”分，选择“否”则计“0”分。条目 10、13、14 为反向计分，选择“是”则计“0”分，选择“否”则计“1”分。各项条目累加为疲劳总分数，最低为 0 分，最高为 14 分，分数越高，提示疲劳程度越严重。

## 2.精神症状评定量表

HAMA 评估焦虑状态：有 14 个项目，采用 0-4 分的 5 级评分法，从躯体性及精神性两方面进行评分，分数越高，提示焦虑症状越严重。

HAMD 评估抑郁状态：本试验采用 17 项版本，有绝望感、焦虑、躯体化症状、睡眠障碍等 7 个因子 0。分数越高，抑郁越严重。

## 3.PSG 监测

采集时间点：所有患者于治疗前、治疗结束 1 周内进行 PSG 监测。

监测方法：采用 PSG 监测仪，严格按照 PSG 监测仪操作规范，按受试者日常就寝习惯进行监测。PSG 监测仪导联包括脑电图、眼动图、肌电图(下颌肌电图) 及腿动(双侧)、口鼻气流、胸腹运动、左手食指动脉血氧饱和度传感器。受试者均需在专业的实验室度过 1 夜。受试者睡单间，仪器和记录放置在另一

房间，室温 18°C~26°C，由受者自行安排睡眠和起床时间。试睡时的各项条件与正式检测时相同。若当夜睡眠记录因环境改变不能反映平时睡眠情况，资料舍弃不用。

受试者要求:(1)解除心理紧张 ;(2)描记时间按被试者日常就寝习惯进行。

资料分析:睡眠分期参考 2007 版美国睡眠医学会睡眠及其相关事件判读手册，将睡眠分为清醒期（W 期）、N1 期睡眠、N2 期睡眠、N3 期睡眠、R 期睡眠、觉醒、大体动期。预计观察指标与数据：观察治疗前后睡眠潜伏期、觉醒次数、觉醒时间、深睡眠时间、睡眠效率。

4. 促肾上腺皮质激素(ACTH)、促肾上腺皮质激素释放激素(CRH)、皮质醇(CORT)、5-羟色胺(5-HT)检测。

采集时间点：所有入组患者于治疗前、治疗结束时抽血检测。

检测方法：PSG 检测第二天清晨抽静脉血 4ml,加入抗凝剂，3000·转/分离心,分离出血浆置于低温冰箱(-70°C)保存至测定,测定时采用贝克曼公司 ACCESS 全自动化学发光酶免分析仪,试剂盒由贝克曼公司生产和提供。

## 七、不良事件的观察

### 1.不良事件轻重程度的判断

轻度：受试者可忍受，不影响治疗，不需要特别处理，对受试者康复无影响。

中度：受试者难以忍受，需要中止试验或做特殊处理，对受试者康复有直接影响。重度：危及受试者生命，致死或致残，需立即停止试验或做紧急处理。

### 2.不良事件与治疗因果关系的判断

根据卫生药品不良反应监察中心制订的标准，按“肯定、很可能、可能、可疑、不可能”五级分类法对不良事件和针刺治疗之间可能存在的关联作出评估。

### 3.不良事件的处理

研究者应要求患者如实反映治疗后的病情变化，避免诱导性提问。发现不良反应时，研究者根据病情决定诊治措施，并决定是否中止观察。出现严重不良事件，必须立即采取必要处理措施，保护受试者安全。研究期间出现的任何不良



反应均应填写“不良事件表”，并追踪调查，详细记录处理经过及结果，直到恢复正常，症状体征消失。追踪随访方式可以根据不良反应的轻重选择住院、门诊、家访、电话、通讯等多种形式。

可能出现的不良反应的处理方法：每次随访应观察和记录病人发生的不良事件，并对不良事件程度及与治疗的关系进行判断（肯定有关，可能有关，可能无关，无关，无法判断）。根据不良事件的严重程度采取必要的处理措施，对因不良事件中止试验者应进行随访观察至不良反应消失，并做详细记录。严重不良事件应严格按照 GCP 相关规定报告处理。

## 八、安全性评价

所有受试者治疗前和治疗结束时进行安全性评价。1 级：安全，无任何不良反应。2 级：比较安全，如有不良反应，不需做任何处理可继续治疗。3 级：有安全性问题，有中等程度的不良反应，做处理后可继续治疗。4 级：因不良反应中止试验。

## 九、质量控制与质量保证体系

### 1. 研究风险分析与控制

#### 1.1 患者退出过多的影响

临床研究中，易发生如工作变动、经常出差、意外变故等原因造成观察对象的失访，自行退出，或因其它不良事件中途脱落。

对策：①研究者加强与患者的沟通和联系，及时掌握研究对象相关生活及工作信息；②保证研究队伍的稳定性，定人，定研究对象，定访问时间；③定期汇报分析，研究者应在每次随访时间点结束时对可能失访的对象及时分析、汇报，并及时采取应对及补救措施；④训练有素的监查员，监查员要保证监查次数和频度。通过上述措施降低风险以确保退出病例 < 20%。

#### 1.2 患者依从性的影响

依从性差及依从性波动，如不按要求进行相关检查等，均可能导致研究数据质

量的下降。

对策：①及时分析依从性差及依从性波动的原因；②耐心、细致地向患者说明研究的目的与过程、风险与收益；③提高服务质量和水平，加强医患沟通与信任。

### 1.3 入组速度与入组病例质量的影响

入组速度过慢可影响周期内研究任务的完成，入组速度过快则可能影响入组病例基线变异偏大，入组病例质量下降。

对策：①严格根据纳入及排除标准筛选入组对象；②增加研究中心，减轻入组时间限制的压力。

## 2. 研究影响因素的分析

### 2.1 选择性偏倚：

严格按照随机数字表入组，可避免人为的干预而导致的选择性偏倚。

### 2.2 测量性偏倚：

检查单上禁止标识受试者组别，可避免测试结果受人为倾向因素的影响而造成的测量性偏倚。

### 2.3 干扰与沾染：

受试者严禁服用其他安眠或者精神类药物，避免干扰与沾染。

### 2.4 机遇：

严格按统计学方法计算样本量，并尽可能降低脱落率，减低机遇可能性。

### 2.5 混乱：

制定并严格执行研究相关标准操作程序，特别是质量控制 SOP，可避免混乱。

### 2.6 依从性：

与受试者进行良好的沟通与合作，取得受试者充分的理解与配合，可提高依从性，将不依从率力争控制在 10% 范围内。

## 3. 研究培训

课题申请者负责组织专家在临床研究开始前对研究者进行研究方案的培训，对症状体征量化标准进行一致性检验。签署研究者声明。

#### 4. 提高受试者依从性的措施

研究者应认真执行知情同意，使受试者充分理解研究要求，配合研究。申办者免费提供治疗、检查、交通费补贴。监测受试者的依从性，依从性<80%或>120%视作对研究方案的重大违反。

#### 5. 质量控制与质量保证体系

研究者应履行各自职责，并严格遵循临床研究方案，采用标准操作规程，以保证临床研究的质量控制和质量保证系统的实施。

监查员应具有医学背景。课题申请者任命刘成勇为监查员，保障参加临床研究受试者的权益，保证研究数据记录与报告真实、准确、完整无误，保证研究遵循已批准的方案、《药品临床研究管理规范》和有关法规。监查员访视的次数要能满足临床研究质量控制的需要。监查员每次访视后向课题负责人通报监查结果。

### 十、数据管理

#### 1. 定义原始数据

原始数据指在一项临床试验中为重构和评价试验所需的所有原始观察、临床发现或其他活动的记录或经证明的复本。这些资料包括实验记录、备忘录、计算与文件、自动化仪器记录的数据、经证实的确切的复印件或缩微胶片等。原始数据也包括摄影负片、缩微胶卷、磁性媒体等。

#### 2. 数据记录的规定及数据报告的方式

##### 2.1 数据记录

鉴于我国医院门诊病历多由患者自带的情况，为完整保存临床研究第一手数据资料，设计本研究专用的“研究病历”。研究病历是临床研究受试者的源文件，应保存于医院。研究病历是门诊受试者的病历资料，与住院病历共同组成住院受试者的病历资料。

研究病历记录要求：①研究者必须在诊治受试者同时书写研究病历，保证数据记录及时、完整、准确、真实。②研究病历做任何有证据的更正时只能划线，

旁注改后的数据，由研究者签名并注明日期，不得擦涂、覆盖原始记录。③门诊受试者的原始化验单粘贴在研究病历上，住院受试者的原始化验单粘贴在住院病历上。门诊与住院受试者的化验结果均需填写至研究病历的“理化检查结果报告表”。

研究病历的审核：每一受试者观察疗程结束后，研究者应在3个工作日内将“研究病历”、“知情同意书”、“睡眠日记”交本单位主要研究者审核、签名；一周内，交项目负责人复审并存入基地资料档案室，发现问题及时处理并记录。

## 2.2 数据报告

采用电子CRF。主要研究者指定专人承担“电子CRF录入员”工作，负责初审研究病历的记录以及登录填报电子CRF的工作。“电子CRF录入员”收到研究病历后必须首先审查：研究病历的项目记录是否完整；然后填报双份电子CRF。

## 3. 数据核查的规定

### 3.1 数据监查

监查员的人数及访视频度须满足临床研究的质控要求。监查员审核每份研究病历，并逐份填写“监查员审核页”。

监查员应两人以读看的方式、100%的核对源数据与电子CRF数据的一致性，并完成“数据一致性检查报告”。如果发现填报数据错误，提交“数据一致性检查纠错报告”，由电子CRF数据管理员据此修正。

### 3.2 数据检查与盲态审核

建立数据库。数值范围和逻辑检查，如有疑问，填写疑问清单（query list），由研究者对疑问清单中的问题进行解答。完成数据检查报告。

完成数据盲态审核报告后，锁定数据库。

应保存质量控制的有关文件，如数据一致性检查、数值范围和逻辑检查的原始记录、盲态审核时的原始记录、研究者与监查员间交流的疑问记录等。

## 十一、统计分析

在本次研究中首先使用软件SPSS22.0对试验资料进行处理，计量资料采用

$\bar{x}\pm s$  表示，计数资料用率或构成比表示。两组间计量资料比较，先行正态性分析，符合正态性和方差齐性的计量资料采用 t 检验，不符合正态性分布的计量资料采用非参数秩和检验；计数资料采用卡方检验或 Fisher 确切概率法。P<0.01 为差异有显著意义；P<0.05 为两组间的差异有统计学意义。

## 十二、伦理原则

### 1. 伦理审查体系

临床研究方案由项目申报者，报伦理委员会审批后实施。若本方案在临床研究实施过程中进行了修订，需再次报请伦理委员会批准后实施。

### 2. 受益与风险

受试者和社会将可能从本项研究中受益。此种受益包括受试者的病情有可能获得改善，以及本项研究可能开发出一种新的治疗方法，以用于患有相似病情的其他病人。受试者在研究期间可免费获得与研究有关的检查费用，随访时的挂号费。受试者将在研究期间获得良好的医疗服务。

受试者参加本项临床研究可能面临的风险包括：针刺过程中有极少部分患者会出现晕针现象，及时停止针刺，休息保暖均可缓解。

### 3. 知情同意

筛选合格的志愿者，研究者必须说明有关临床研究的详细情况，包括研究目的、研究程序、可能的受益和风险、受试者的权利和义务等，使受试者充分理解并有充分的时间考虑、所提问题均得到满意答复后表示同意，并签署“知情同意书”后方能开始临床研究。每一例病人签署知情同意书时医生要将自己的联系电话留给病人，以便病人在出现病情变化时能够随时找到医生。

### 4. 招募受试者

采用院内招募受试者布告的方式发布有关信息→有意向者报名→阅读研究简介→志愿者体检→筛选→合格者签署知情同意书→入选受试者。

### 5. 受试者的医疗与保护

研究者负责受试者的医疗，作出与临床研究相关的医疗决定，保证受试者在研究期间出现不良事件时得到适当的治疗。

申办者应与研究者迅速研究所发生的严重不良事件，采取必要的措施以保证受试者的安全和权益。申办者对与研究相关的损害或死亡承担治疗的费用及相应的经济补偿。申办者应向研究者提供法律上与经济上的担保，但由医疗事故所致者除外。

免费获得治疗，免费进行与研究有关的检查，访视时的挂号费免费。如果发生与研究有关的严重不良事件，将得到免费医疗。试验结束后，医生将继续对您提供健康指导与治疗建议，费用自理。

受试者隐私的保护：只有参与临床研究的研究人员和监查员才可能接触到受试者的个人医疗记录，他们将签署“研究者声明”或“保密承诺”中包括保密内容。药品监督管理部门有权视查临床研究记录。数据处理时将采用“数据匿名”的方式，省略可识别受试者个体身份的信息。

### 十三、总结与资料保存

#### 1. 总结

完成临床研究资料的统计工作。并撰写“临床研究总结报告”，盖章后交申办者若干份。

#### 2. 资料保存

研究病历、知情同意书、患者治疗记录卡、睡眠日记、电子病例报告表由江苏省中医院归档保存。

### 十四、任务分配，预期进度、预期成果

#### （一）任务分配

于江苏省中医院完成病例 60 例，其中试验组病例 30 例，对照组病例 30 例。

#### （二）预期进度及预期成果

| 时间安排 | 研究内容(分期目标) | 预期成果 |
|------|------------|------|
|------|------------|------|

|                      |                                                   |                           |
|----------------------|---------------------------------------------------|---------------------------|
| 2019.01--<br>2019.03 | 查阅文献，完成研究方案的优化，向伦理委员会提交伦理审查。                      | 完成研究方案优化，完成伦理审查。          |
| 2019.04--<br>2019.06 | 招募患者，完成失眠日记、病例观察表、PSQI 等量表的准备工作，开始收集入组病例。         | 完成患者招募及前期准备工作。            |
| 2019.07--<br>2020.03 | 进行临床研究、完成 60 例慢性失眠症患者的入组，完成治疗、PSQI 等量表评价及 PSG 检测。 | 完成部分患者治疗、量表及 PSG 检测。      |
| 2020.04--<br>2020.06 | 进行临床研究、完成入组患者代谢组学检测、PSG 检测、临床随访。                  | 完成入组患者代谢组学检测、PSG 检测、临床随访。 |
| 2020.07--<br>2020.12 | 患者随访，病例观察表填写，数据收集整理，发表论文，撰写结题报告。                  | 完成论文，结题报告。                |

Article information: <https://dx.doi.org/10.21037/atm-21-3845>
